# Supplementary material
Source: MDPI journal article supplement (https://www.mdpi.com/1999-4907/11/1/47)
Supplement: s1 [file s1]

1 *SUPPLEMENTARY TABLE*

2 **Table S1.** Number of trees, mean diameter and mean diameter coefficient of variation (CV) for each  
3 plot at the time of girth tapes placement in 2014.

| Plot | N. of trees | Mean Diameter<br>(cm) | CV (%) |
|------|-------------|-----------------------|--------|
| 1    | 39          | 16.53                 | 18%    |
| 2    | 51          | 16.55                 | 20%    |
| 3    | 46          | 16.77                 | 22%    |
| 4    | 43          | 18.26                 | 21%    |
| 5    | 32          | 20.14                 | 27%    |
| 6    | 61          | 17.70                 | 20%    |
| 7    | 62          | 15.61                 | 28%    |
| 8    | 56          | 16.79                 | 23%    |
| 9    | 61          | 16.37                 | 19%    |

4
